# Supplementary material
Source: PubMed Central journal article supplement (PMC3511847)
Supplement: NIHMS408096-supplement-Supplementery_materials.pdf [file NIHMS408096-supplement-Supplementery_materials.pdf]

Supporting Information:

Table S1. Complete assessment schedule for the monkey infants whose social testing is presented in the current research report.

Table S2. Monoamine metabolites in CSF of 4-month old rhesus monkey infants

Table S3. [<sup>11</sup>C]-Raclopride binding potentials from PET imaging evaluating of DRD2 in striatum of 12-month old infants.

Table S4. Definition of temperament descriptors for ratings of temperament of 3-4 month old infants.

**Table S1.** Complete Assessment Schedule

| <b>Age</b>   | <b>Sessions</b> | <b>Assessment</b>                                                                                                                                                           | <b><u>Apical variable</u></b>                                                                                                                                                                       |
|--------------|-----------------|-----------------------------------------------------------------------------------------------------------------------------------------------------------------------------|-----------------------------------------------------------------------------------------------------------------------------------------------------------------------------------------------------|
| Day of birth | 1               | CBC, blood samples for iron status and lymphocyte assay, morphometrics                                                                                                      | <u>Body weight, hemoglobin</u>                                                                                                                                                                      |
| 2-5 weeks    | 1/week          | Oral iron supplement/placebo                                                                                                                                                |                                                                                                                                                                                                     |
| 3-4 months   | 1 day           | Biobehavioral assessment<br>Home cage behavior<br>Cortisol response<br>Novel object contact<br>Human Intruder<br>Adult nonsocial/aggression video<br><br>Temperament rating | <u>Not reported</u><br><u>Not reported</u><br><u>Not reported</u><br><u>Not reported</u><br><u>Time looking at nonsocial and aggressive video segments</u><br><u>Rating on 16 temperamen scales</u> |
| 4 months     | 1               | CSF sample                                                                                                                                                                  | <u>5HIAA, HVA</u>                                                                                                                                                                                   |
| 6 months     | 1               | CBC, blood samples for iron status, morphometrics                                                                                                                           | <u>Body weight, hemoglobin</u>                                                                                                                                                                      |
| 4-6 months   | 1               | Weaning                                                                                                                                                                     |                                                                                                                                                                                                     |
| 4-8 months   | 3/week          | WGTA training                                                                                                                                                               |                                                                                                                                                                                                     |
| 7-8 months   | 2               | Social buffering                                                                                                                                                            | <u>Change in plasma cortisol</u>                                                                                                                                                                    |
| 8-12 months  | 1-2/week        | Social dyadic interaction                                                                                                                                                   | <u>Affiliation behavior</u>                                                                                                                                                                         |
| 8-11 months  | 3-5/week        | Reward devaluation (WGTA)                                                                                                                                                   | <u>Not reported</u>                                                                                                                                                                                 |
| 11 months    | 3               | Reward delay (WGTA)                                                                                                                                                         | <u>Not reported</u>                                                                                                                                                                                 |
| 11-12 months | 2               | Social intruder                                                                                                                                                             | <u>Proximity to intruder</u>                                                                                                                                                                        |
| 12 months    | 1               | CBC, blood samples for iron status, morphometrics                                                                                                                           | <u>Body weight, hemoglobin</u>                                                                                                                                                                      |
| 12 months    | 2 days          | Home cage activity monitoring                                                                                                                                               | <u>Not reported</u>                                                                                                                                                                                 |
| 12-14 months | 3               | Picture-elicited aggression                                                                                                                                                 | <u>Fear, aggressive behavior</u>                                                                                                                                                                    |
| 14-18 month  | 5/week          | Fixed Interval and Continuous Performance Test (operant training to criteria and drug response)                                                                             | <u>Not reported</u>                                                                                                                                                                                 |
| 16-18 months | 5/week          | Cognitive puzzles and mazes                                                                                                                                                 | <u>Not reported</u>                                                                                                                                                                                 |
| 18 months    | 5/week          | Reward discounting                                                                                                                                                          | <u>Not reported</u>                                                                                                                                                                                 |
| 18-24 months | 1               | PET scan                                                                                                                                                                    | <u>Binding potential</u>                                                                                                                                                                            |
| 22.5 months  | 1               | CBC, blood samples for iron status, morphometrics                                                                                                                           | <u>Body weight, hemoglobin</u>                                                                                                                                                                      |
| 22.5 months  | 2 days          | Home cage activity monitoring                                                                                                                                               | <u>Not reported</u>                                                                                                                                                                                 |

**TABLE S2.** CSF monoamine metabolites at 4 months of age

|               | hi-MAOA ID<br>n=5           | hi-MAOA IS<br>n=4 | low-MAOA ID<br>n=4 | low-MAOA IS<br>n=4 |
|---------------|-----------------------------|-------------------|--------------------|--------------------|
| 5HIAA (ng/mL) | 103.98 ± 12.28 <sup>1</sup> | 101.22 ± 11.64    | 100.84 ± 11.29     | 98.80 ± 8.41       |
| HVA (ng/mL)   | 469.73 ± 23.60              | 448.16 ± 63.81    | 451.25 ± 22.70     | 437.44 ± 56.15     |
| HVA/5HIAA     | 4.65 ± 0.28                 | 4.38 ± 0.22       | 4.65 ± 0.61        | 4.39 ± 0.27        |

<sup>1</sup> Mean ± SEM, no statistical group differences by two-way ANOVA.

**TABLE S3.** Binding potentials for dopamine D2 receptors during PET

| Location      | hi-MAOA ID<br>n=5        | hi-MAOA IS<br>n=4 | low-MAOA ID<br>n=4 | low-MAOA IS<br>n=4 |
|---------------|--------------------------|-------------------|--------------------|--------------------|
| Left caudate  | 4.93 ± 0.42              | 5.64 ± 0.25       | 4.68 ± 0.49        | 4.22 ± 0.60        |
| Right caudate | 4.97 ± 0.35              | 5.66 ± 0.17       | 4.57 ± 0.44        | 4.21 ± 0.58        |
| Left putamen  | 5.33 ± 0.41 <sup>1</sup> | 5.85 ± 0.14       | 5.01 ± 0.47        | 4.40 ± 0.51        |
| Right putamen | 5.37 ± 0.37              | 6.08 ± 0.13       | 5.15 ± 0.45        | 4.37 ± 0.48        |

<sup>1</sup> Mean ± SEM, no group difference in two-way ANOVA at each site

**Table S4.** Temperament Ratings

At the end of the 25-hr assessment, each animal was rated on a 1-7 scale for each of 16 traits. Here are variable names (the capitalized variable is the name of the trait) and definitions.

**Active, energetic:** Moves about a lot, distance traveled by walking, running, climbing, or jumping. Not lethargic.

**Aggressive:** High frequency of displays, threats.

**Bold:** fearless; Is daring, not restrained or tentative. Not timid, shy, or coy.

**Calm, equable:** Reacts in an even, calm way; is not easily disturbed. Not agitated. Restful, peaceful.

**Confident:** Behaves in a positive, assured manner, not restrained or tentative.

**Curious, exploratory, inquisitive:** Readily explores new situations, seeking out or investigating novel situation.

**Depressed:** Subject appears isolated, withdrawn, sullen, brooding, and has reduced activity.

**Fearful:** Fear grins; retreats readily from others or from outside disturbances.

**Flexible, not rigid:** Adapts to situations. Is able to accommodate new ways of doing things.

**Gentle:** Subject responds to technicians in an easy-going, kind, and considerate manner. Subject is not rough or threatening.

**Nervous, anxious, not calm:** Jittery, anxious, seems to be anxious about everything.

**Playful:** Engages in self-play (hanging, swinging, jumping), or object play.

**Slow:** Moves and sits in a relaxed manner; moves slowly and deliberately, not easily hurried.

**Tense:** Shows restraint in posture and movement; carries the body stiffly, which suggests a shrinking tendency, as if trying to pull back and be less conspicuous.

**Timid:** Subject is easily alarmed and is hesitant to venture into new situations.

**Vigilant, alert:** Ready, attentive, watchful, notices with special attention. Not oblivious to surroundings.
